# Supplementary material for: Control of Apoptosis by Asymmetric Cell Division
Source: PLOS journal article supplement (doi:10.1371/journal.pbio.0060084), 2008-04-02
Supplement: S3 (10.1371/journal.pbio.0060084.s003) [file journal.pbio.0060084.s003]

Table S3. *dnj-11(bc212)* and *dnj-11(tm2859)* cause embryonic lethality.

| Genotype | Unhatched eggs [% of laid eggs] (n) | |
| --- | --- | --- |
| +/+ | 2 | (122) |
| *dnj-11(bc212)* | 24 | (108) |
| +/+* | 2 | (222) |
| *dnj-11(tm2859)** | 26 | (47) |
